# Supplementary material
Source: PubMed Central journal article supplement (PMC4831308)
Supplement: BPH-173-1556-s001.pdf [file BPH-173-1556-s001.pdf]

Supplemental material for online publication only

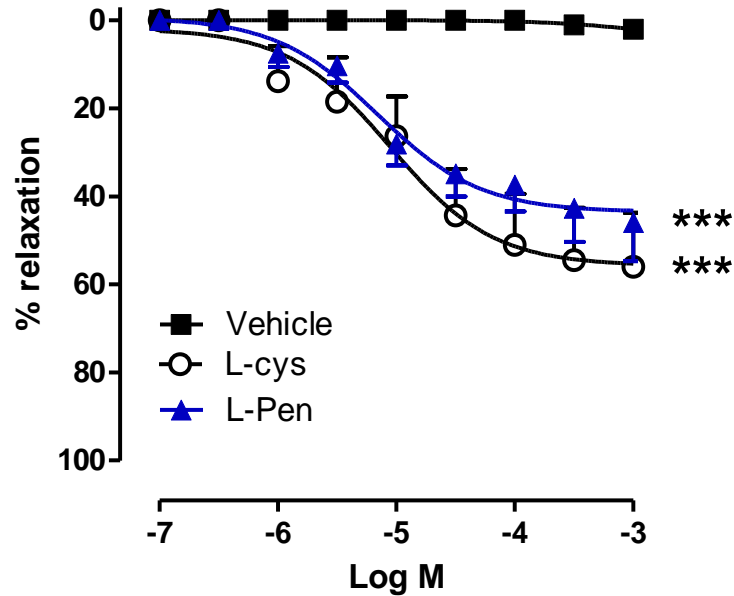

**Supplemental figure 1**

Concentration-response curves for L-Pen, L-cysteine (L-cys) and the vehicle in aorta rings contracted with phenylephrine (1 $\mu$ M, n=6). \* indicate significant differences ( $P < 0.05$ ) for comparisons with vehicle.

**A**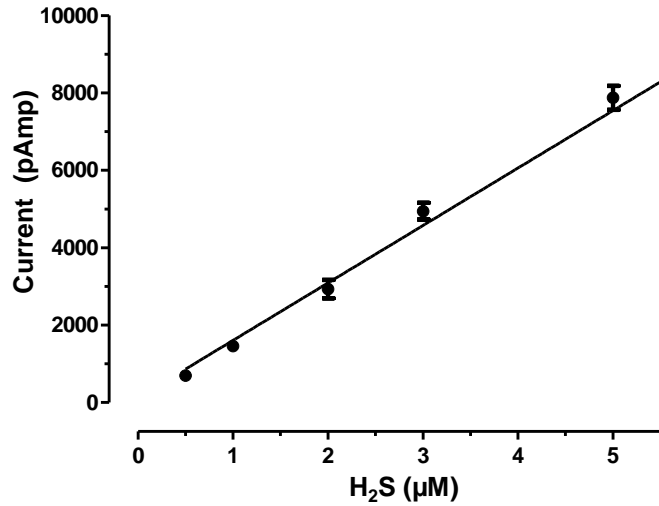**B**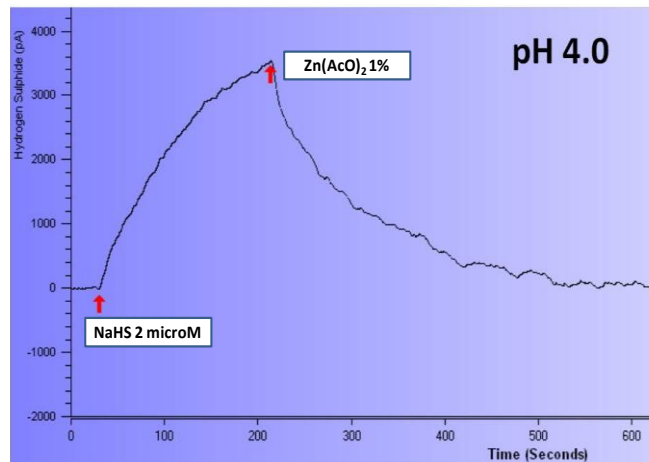

### Supplemental figure 2

(A) Calibration curve for H<sub>2</sub>S non-enzymatic release measured as known concentration of H<sub>2</sub>S vs current measured in pAmps (pH 4) ( $r^2=0.966$ ). Data are expressed as mean $\pm$ SEM. (B) Representative graph showing increase in current (pAmps) induced by H<sub>2</sub>S release vs time (pH 4). In addition, the effect of zinc acetate [1% w/v Zn(AcO)<sub>2</sub>] addition on H<sub>2</sub>S non-enzymatic release is also displayed. The graph shows that H<sub>2</sub>S-induced current decreased as soon as Zn(AcO)<sub>2</sub> was added to the reaction mixture.

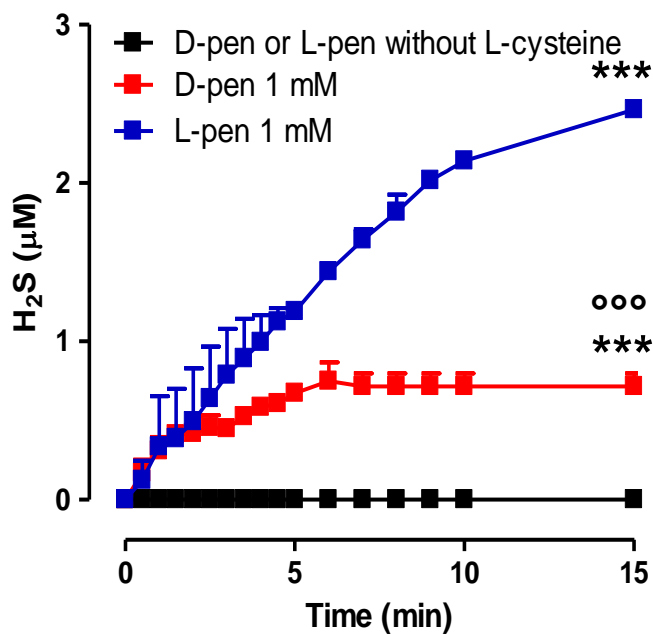

### Supplemental figure 3

Amperometric measurement vs time of cell free H<sub>2</sub>S release by D-pen (1 mM) or L-pen (1 mM) in aqueous buffer vehicle (n=6). The assay has been run in presence of L-cysteine, used as nucleophilic agent. ° indicates significant difference (P<0.05) for comparisons with L-pen. \* indicates significant difference (P<0.05) for comparisons with assay run in absence of L-cysteine.

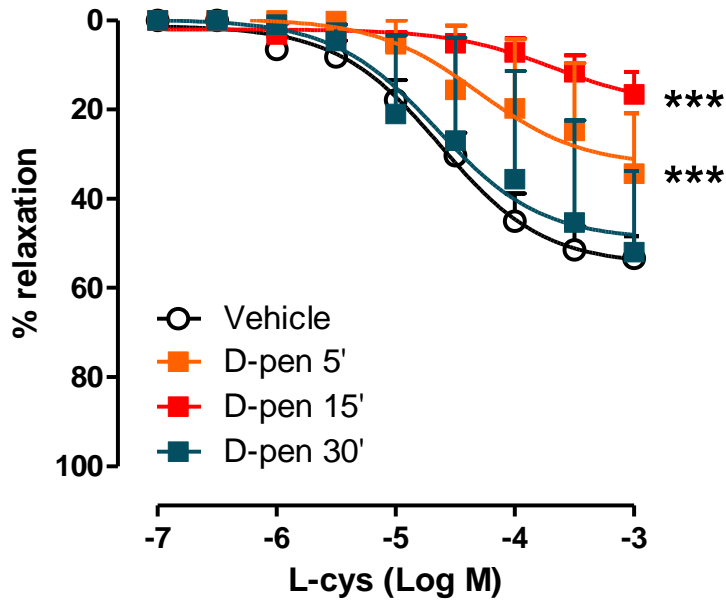

#### Supplemental figure 4

Effect of D-pen 100µM on L-cys induced vasodilation in isolated aorta rings at different time of incubation (5, 15, 30 min). D-pen was already effective after 5 min pre-incubation, however maximum effect was achieved after 15 min. Pre-incubation for 30 min did not result in any significant effect on L-cys-induced vasodilation. \* indicates significant difference ( $P < 0.05$ ) for comparison with vehicle.
